# Supplementary material
Source: MDPI journal article supplement (https://www.mdpi.com/2673-396X/5/2/12)
Supplement: s1 [file s1]

**Table S1.** Characteristic <sup>1</sup>H-NMR peaks for metabolites of interest.

| Metabolite        | Shift (ppm) | H's | Multiplicity | J-coupling (Hz) |
|-------------------|-------------|-----|--------------|-----------------|
| Thymine           | 1.86        | 3   | s            |                 |
| Glucose           | 5.24        | 1   | d            | 3.76            |
|                   | 4.65        | 1   | d            | 7.95            |
| Pyruvate          | 2.36        | 3   | s            |                 |
| Lactate           | 1.32        | 3   | d            | 6.91            |
| Alanine           | 1.47        | 3   | d            | 7.30            |
| Sorbitol          | 3.85        | 2   | d            | 2.62            |
| 3-Hydroxybutyrate | 1.19        | 3   | d            | 6.23            |
| Acetone           | 2.22        | 6   | s            |                 |
| Acetoacetate      | 2.27        | 3   | s            |                 |
| Glycerol          | 3.64        | 4   | dd           | 11.8, 4.4       |
| Acylcarnitine     | 3.18        | 9   | s            |                 |
| Carnitine         | 3.22        | 9   | s            |                 |
| Choline           | 3.19        | 9   | s            |                 |
| Glycine           | 3.54        | 2   | s            |                 |
| Taurine           | 3.27        | 2   | t            | 8.67, 8.67      |
| Citrate           | 2.65        | 2   | d            | 15.1            |
| α-Ketoglutarate   | 3.00        | 2   | t            | 6.76, 6.76      |
| Succinate         | 2.39        | 4   | s            |                 |
| Fumarate          | 6.51        | 2   | s            |                 |
| Malate            | 4.29        | 1   | dd           | 10.00, 3.30     |
| Oxaloacetate      | 3.67        | 2   | s            |                 |
| Isoleucine        | 0.924       | 3   | t            | 7.40, 7.40      |
| Leucine           | 0.945       | 6   | t            | 5.70, 5.70      |
| Valine            | 1.03        | 3   | d            | 7.02            |
| Phenylalanine     | 3.14        | 1   | dd           | 14.44, 7.44     |
| Tyrosine          | 6.91        | 2   | d            | 8.61            |
| Tryptophan        | 7.72        | 1   | d            | 7.93            |
| Glutamate         | 2.04        | 1   | m            |                 |
| Glutamine         | 2.44        | 2   | m            |                 |

**Table S2.** qPCR primers.

| Gene Name                             | Sequence (5'-3')         |
|---------------------------------------|--------------------------|
| <i>Rpl32</i> forward                  | AAACTGGCGGAAACCCAGAG     |
| <i>Rpl32</i> reverse                  | GCAATCTCAGCACAGTAAGATT   |
| <i>Plin2</i> forward                  | TGTGTGTGTGTGTGTGTAGAG    |
| <i>Plin2</i> reverse                  | GGCCAGTGAGATGGCTTAAT     |
| <i>Pnpla2</i> forward                 | GAGTTTCGGATGGAGAGAATGT   |
| <i>Pnpla2</i> reverse                 | GCCACAGTACACAGGGATAAA    |
| <i>Ccl3</i> forward                   | CCTATGGACGGCAAATCCAC     |
| <i>Ccl3</i> reverse                   | AGATCTGCCGTTTCTCTTGG     |
| <i>Ccl5</i> forward                   | CATATGGCTCGGACACCACT     |
| <i>Ccl5</i> reverse                   | GACTGCAAGGTTGGAGCACT     |
| <i>Acox1</i> forward                  | TGCTTTGGTGTCTGTCACTTC    |
| <i>Acox1</i> reverse                  | ATTGAGGCCAACAGGTTCCA     |
| <i>Mcp-1</i> forward                  | CTTCCTCCACCACTATGCAGG    |
| <i>Mcp-1</i> reverse                  | GATGCTACAGGCAGCAACTG     |
| <i>Lxra</i> forward                   | GAGGGCTGCAAGGGATTCTT     |
| <i>Lxra</i> reverse                   | CATTTGCGAAGGCGACACTC     |
| <i>Tgf-<math>\beta</math></i> forward | CCACGTAGTAGACGATGGGC     |
| <i>Tgf-<math>\beta</math></i> reverse | GCTAGCTGATTACTTCTGTGTAGT |
| <i>Ifn-<math>\beta</math></i> forward | ACTACAAGCAGCTCCAGTTC     |
| <i>Ifn-<math>\beta</math></i> reverse | TGAGGTTGAGCCTTCCATTC     |
| <i>Vegf-a</i> forward                 | CGACAGAAGGGGAGCAGAAA     |
| <i>Vegf-a</i> reverse                 | CCTTGGCTTGTACATCTGC      |
| <i>Vegf-c</i> forward                 | GTTCGGATGTCCGTTTCCT      |
| <i>Vegf-c</i> reverse                 | GCCTTCGAAACCCTTGACCT     |

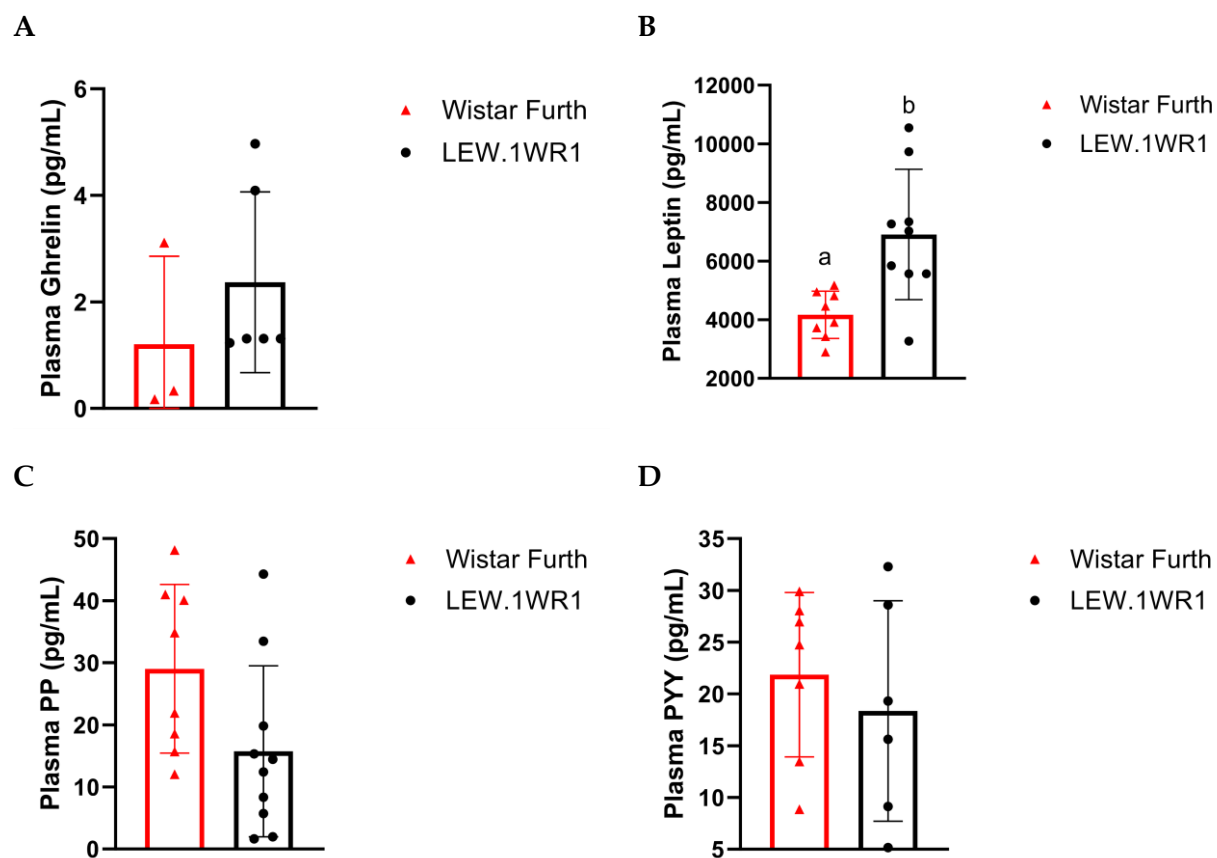

**Figure S1.** Plasma metabolites that are associated with hunger and satiety: (A) ghrelin (n.s., n = 3, 6), (B) leptin ( $p = 0.0060$ , n = 8, 9), (C) pancreatic polypeptide (PP) (n.s., n = 8, 10), and (D) peptide tyrosine tyrosine (PYY) (n.s., n = 7, 6).
